# Supplementary material for: Time-restricted feeding alters lipid and amino acid metabolite rhythmicity without perturbing clock gene expression
Source: PubMed Central journal article supplement (PMC7495469; doi:10.1038/s41467-020-18412-w), 2020-09-16
Supplement: 41467_2020_18412_MOESM2_ESM.pdf [file 41467_2020_18412_MOESM2_ESM.pdf]

## Description of Additional Supplementary Files

**File Name:** Supplementary Data 1

**Description:** Summary statistics of all rhythmic features. Data includes, RAIN derived p-values, FDR adjusted p-values, estimated period, MESOR, Amplitude, and acrophase

**File Name:** Supplementary Data 2

**Description:** Skeletal muscle and serum metabolite raw data.
